# Supplementary material for: Systematic Functional Analysis of Bicaudal-D Serine Phosphorylation and Intragenic Suppression of a Female Sterile Allele of BicD
Source: PubMed Central journal article supplement (PMC2639643; doi:10.1371/journal.pone.0004552), 2009-02-23
Supplement: pone.0004552.s001.pdf [file pone.0004552.s001.pdf]

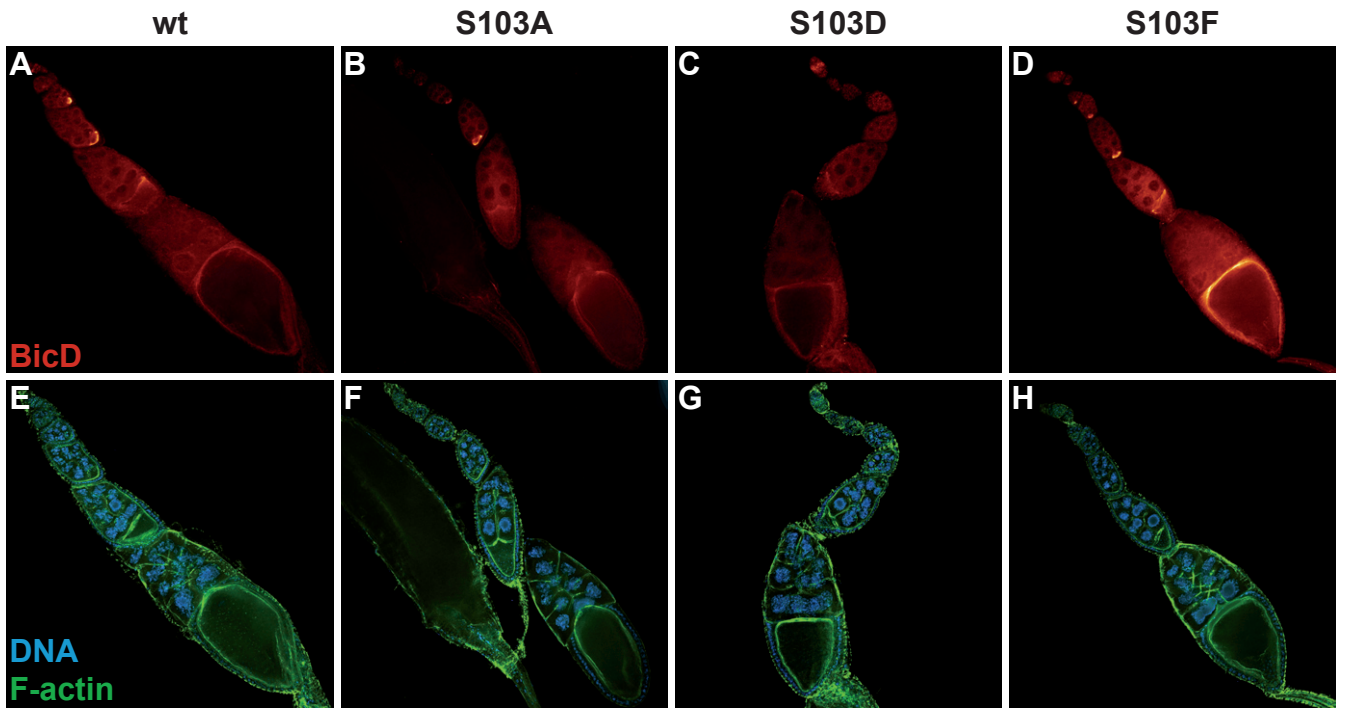

SUPPORTING FIGURE S1. **Effect of amino acid 103 on BicD localization.** Immunostainings of ovaries from indicated BicD mutant females stained with anti-BicD antibodies (red). DNA was visualized with Hoechst (blue), and actin filaments were stained with FITC-phalloidine (green). The intensity of BicD accumulation in the oocyte is dependent of the amino acid 103. Maximum projections of z-stacks are shown. Panels E-H: for clarity reasons, individual panels are composed of different optical sections.
